# Supplementary material
Source: Elsevier journal article supplement (https://www.sciencedirect.com/science/article/pii/S265966362030045X)
Supplement: mmc1 [file S265966362030045X:mmc1.pdf]

## BÚSQUEDA EN DISTINTAS BASES BIBLIOGRÁFICAS

### 1. MEDLINE:

La búsqueda se dirigió a dos aspectos:

- población: enfermos con EPOC ("Pulmonary Disease, Chronic Obstructive") que es un término MESH ("MEDical Subject Heading") y que se puede incluir en el algoritmo de búsqueda de PUBMED como término principal, no como mención colateral o lejana (opción "Restrict to MeSH Major Topic" que corresponde la siga "Majr"); y
- herramienta diagnóstica con el esquema ("Spirometry[Majr], o "mini-spirometry", o "portable – spirometry" o "hand – held – spirometry", como texto libre). El término mini-espirometría y análogos no existe como término MESH. Se optó por incluir el término análogo aceptado ("Spirometry"), con una estrategia amplia y muy sensible de inclusión de muchos trabajos que solo incluirían espirometría convencional, con el descarte posterior tras su revisión para no perder de entrada títulos posiblemente relacionados con el interés de nuestro trabajo. Añadir los términos mini / manual espirometría intentaban hacer la búsqueda más específica, para intentar no perder algún trabajo citado concretamente con estos términos.

La búsqueda se restringió a dos tipos de artículos (article types): Clinical trials y Reviews.

Se obtuvieron 463 artículos.

Las búsquedas con otras bases de datos / metabuscadores fueron análogas.

2. EMBASE: con la estrategia de búsqueda PICO, incluyendo en el apartado población "chronic obstructive pulmonary disease" y en el apartado "intervención" de forma sucesiva los términos "spirometry", "mini spirometry", "manual spirometry", "hand held spirometry" y "portable spirometry" se obtienen escasas referencias (23) probablemente debido a que este esquema está dirigido a intervenciones terapéuticas más que diagnósticas. Con la opción QUICK SEARCH de este buscador y los mismos términos se obtienen 591 resultados.
3. WEB OF SCIENCE (WOS): se puede consultar a partir de la web que depende del Ministerio de Ciencia e Innovación <https://www.recursoscientificos.fecyt.es/>. Se introduce en el apartado de Búsqueda Básica los términos "Enfermedad Pulmonar Obstructiva Crónica", "espirometría" y los términos relacionados con la espirometría portátil, y se obtienen 11 citas
4. ELSEVIER, que incluye los metabuscadores SCOPUS y SCIENCE DIRECT: buscando en la web <https://www.elsevier.com/search-results?>, con la limitación "journals", con el mismo esquema de búsqueda (chronic obstructive pulmonary disease (manual OR mini OR hand held OR portable) se obtienen 504 resultados.
5. COCHRANE LIBRARY PLUS: en la web [www.cochranelibrary.com/search](http://www.cochranelibrary.com/search) e introducir los términos "chronic obstructive pulmonary disease" y "diagnosis" se obtienen 17 citas.
6. CLINICALTRIALS.GOV: al introducir el término de búsqueda "chronic obstructive pulmonary disease", con los otros términos ("other terms") "spirometry" "mini spirometry" "manual spirometry", "hand held spirometry" y "portable spirometry" y seleccionando la opción "observational studies" se obtienen 100 citas.
7. TRIPDATABASE. Se introducen como términos de búsqueda population intervention (title:pulmonary disease chronic obstructive) por una parte, y de forma sucesiva (title:spirometry) se obtienen 31 resultados

8. LILACS: La búsqueda literal en el enlace <http://bases.bireme.br/cgi-bin/wxislind.exe/iah/online/> introduciendo “enfermedad pulmonar obstructiva crónica” en el primer campo de búsqueda, y sucesivamente “espirometría”, “mini espirometría”, “espirometría portátil” y “espirometría manual” en el segundo campo, sin restringir asunto de búsqueda, obtiene finalmente 159 citas.
9. TESEO (base de datos de tesis doctorales de universidades españolas): en la página web <https://www.educacion.gob.es/teseo/mostrarSeleccion.do?ref=844467> se introducen las palabras de búsqueda “enfermedad pulmonar obstructiva crónica” y “espirometría” (y “mini espirometría”, y “espirometría manual”, y “espirometría portátil”, de forma sucesiva); se obtienen en total 42 citas.
